# Supplementary material
Source: publisher figshare collection journal article supplement (https://sage.figshare.com/ndownloader/files/22936169)
Supplement: Supplementary file 1 [file 22936169]

**Supplementary table 1:** Structure of social networks of severely mentally ill service users according to severity of their psychosocial functioning (HoNOS). Morpheus Study. Belgium 2014–2015 (n=380).

|                                                 | Severity of psychosocial functioning |                      |                     |         |
|-------------------------------------------------|--------------------------------------|----------------------|---------------------|---------|
|                                                 | Low <sup>1</sup>                     | Average <sup>1</sup> | Strong <sup>1</sup> | F Value |
| <b>Size and composition measures</b>            |                                      |                      |                     |         |
| Support persons (no.) (i.e. network size)       | 13                                   | 12.1                 | 11.5                | 2.7     |
| Professionals (no.)                             | 7.7                                  | 7.7                  | 7.3                 | 0.4     |
| Mental health services (no.)                    | 6.1                                  | 6.3                  | 5.9                 | 1.4     |
| Health services (no.)                           | 1.0                                  | 0.9                  | 0.9                 | 0.2     |
| Social services (no.)                           | 1                                    | 0.8                  | 0.9                 | 0.6     |
| Justice (no.)                                   | 0.1                                  | 0.1                  | 0.1                 | 0.1     |
| Generic services (no.)                          | 0.3                                  | 0.3                  | 0.2                 | 1       |
| Non-professionals (no.)                         | 5.3                                  | 4.5                  | 4.1                 | 4.4 *   |
| Family members (no.)                            | 3.0                                  | 2.8                  | 2.5                 | 1.7     |
| Friends (no.)                                   | 1.4                                  | 1.2                  | 1.1                 | 1       |
| Diversity of professional services (no.)        | 4.2                                  | 3.7                  | 3.7                 | 2.6     |
| Diversity of professional functions (no.)       | 6.1                                  | 5.9                  | 5.6                 | 2.2     |
| Diversity of types of alters <sup>2</sup> (no.) | 3.5                                  | 3.3                  | 3.3                 | 2.3     |
| <b>Cohesion measures</b>                        |                                      |                      |                     |         |
| Density (%)                                     | 0.2                                  | 0.2                  | 0.2                 | 1.1     |
| Fragmentation (%)                               | 0.7                                  | 0.6                  | 0.7                 | 4.3 *   |
| Components (no.)                                | 5.8                                  | 4.8                  | 5.4                 | 2.7     |
| Components (excluding isolates) (no.)           | 2                                    | 1.7                  | 1.7                 | 4.5 *   |
| Isolates (no.)                                  | 3.7                                  | 3.1                  | 3.7                 | 1.6     |
| Size of the largest component (no.)             | 6.4                                  | 7.1                  | 5.8                 | 3.5 *   |

|                                                                             |      |      |      |         |
|-----------------------------------------------------------------------------|------|------|------|---------|
| Alters in largest component (%)                                             | 0.5  | 0.6  | 0.5  | 4.6 *   |
| Size of the largest clique (no.)                                            | 4.7  | 4.4  | 4.1  | 1.6     |
| Average size of component (no.)                                             | 3    | 3.4  | 2.5  | 4.3 *   |
| Cliques of maximum size (no.)                                               | 1.6  | 1.8  | 1.6  | 0.8     |
| Degree centralization (%)                                                   | 0.2  | 0.2  | 0.2  | 1.6     |
| Betweenness centralization (%)                                              | 0.1  | 0.1  | 0.1  | 4.7 *** |
| Average degree (no.)                                                        | 2.4  | 2.5  | 2.1  | 0.8     |
| Homophily between professionals and non-professionals (ranges from -1 to 1) | -0.4 | -0.2 | -0.3 | 1.3     |
| Homophily between types of alters <sup>2</sup> (ranges from -1 to 1)        | 0.2  | 0.2  | 0.1  | 1.4     |

<sup>1</sup> According to the HoNOS score: low = below 11. average = between 11 and 17. high = 18 and higher.

<sup>2</sup> The types of alters used here are: professionals from mental health services. health services. social services. justice. generic services. and non-professionals.

\* p < 0.05; \*\* p < 0.01; \*\*\* p < 0.001
